# Supplementary material
Source: PubMed Central journal article supplement (PMC6398347)
Supplement: NIHMS1504104-supplement-Supplementary_Table_1.pdf [file NIHMS1504104-supplement-Supplementary_Table_1.pdf]

### **Supplementary Table 1. Abbreviation List**

**AAA**, Anterior amygdalar area  
**ACAd**, Anterior cingulate area cortex, dorsal part  
**ACAv**, Anterior cingulate area cortex, ventral part  
**ACB**, Nucleus accumbens  
**AD**, Anterodorsal nucleus thalamus  
**ADP**, Anterodorsal preoptic nucleus hypothalamus  
**AHN**, Anterior hypothalamic nucleus  
**AM**, Anteromedial nucleus thalamus  
**AMd**, Anteromedial nucleus thalamus, dorsal part  
**AMv**, Anteromedial nucleus thalamus, ventral part  
**AON**, Anterior olfactory nucleus  
    **AONd**, Anterior olfactory nucleus, dorsal part  
    **AONe**, Anterior olfactory nucleus, external part  
    **AONI**, Anterior olfactory nucleus, lateral part  
    **AONm**, Anterior olfactory nucleus, medial part  
    **AONpv**, Anterior olfactory nucleus, posteroventral part  
**ARH**, Arcuate hypothalamic nucleus  
**AV**, Anteroventral nucleus thalamus  
**AVP**, Anteroventral preoptic nucleus  
**AVPV**, Anteroventral periventricular nucleus  
**BLA**, Basolateral amygdalar nucleus  
    **BLAa**, Basolateral amygdalar nucleus, anterior part  
    **BLAp**, Basolateral amygdalar nucleus, posterior part  
**BMA**, Basomedial amygdalar nucleus  
    **BMAa**, Basomedial amygdalar nucleus, anterior part  
    **BMAp**, Basomedial amygdalar nucleus, posterior part  
**BST**, bed nucleus of the stria terminalis  
    **BSTal**, bed nucleus of the stria terminalis, anterolateral nucleus  
    **BSTam**, bed nucleus of the stria terminalis, anteromedial nucleus  
    **BSTdm**, bed nucleus of the stria terminalis, dorsomedial nucleus  
    **BSTif**, bed nucleus of the stria terminalis, interfascicular nucleus  
    **BSTmg**, bed nucleus of the stria terminalis, magnocellular nucleus  
    **BSTpr**, bed nucleus of the stria terminalis, principal nucleus  
    **BSTtr**, bed nucleus of the stria terminalis, transverse nucleus  
    **BSTv**, bed nucleus of the stria terminalis, ventral nucleus  
**CA1**, Field CA1  
    **CA1d**, CA1 dorsal  
        **CA1dr**, CA1 dorsal, rostral part  
        **CA1dc**, CA1 dorsal, caudal part  
    **CA1i**, CA1 intermediate  
    **CA1v**, CA1 ventral  
        **CA1vv**, CA1 ventral, ventral part  
**CA2**, Field CA2  
**CA3**, Field CA3  
    **CA3d**, CA3 dorsal  
        **CA3dd**, CA3 dorsal, dorsal part

**CA3i**, CA3 intermediate  
    **CA3id**, CA3 intermediate dorsal  
    **CA3ic**, CA3 intermediate, caudal  
**CA3v**, CA3 ventral  
    **CA3vv**, CA3 ventral, ventral part  
**CEAc**, Central amygdalar nucleus, capsular part  
**CLA**, Claustrum  
**COA**, Cortical amygdalar area  
    **COAa**, Cortical amygdalar area, anterior part  
    **COApl**, Cortical amygdalar area, posterior part, lateral zone  
    **COApm**, Cortical amygdalar area, posterior part, medial zone  
**CP**, Caudate putamen  
**DG**, Dentate gyrus granule cell layer  
    **DGd**, Dentate gyrus granule cell layer, dorsal part  
    **DGi**, Dentate gyrus intermediate granule, intermediate part  
    **DGv**, Dentate gyrus granule cell layer, ventral part  
**DGpo**, Dentate gyrus polymorph layer  
    **DGpod**, Dentate gyrus polymorph layer, dorsal part  
    **DGpov**, Dentate gyrus polymorph layer, ventral part  
**DMH**, Dorsomedial nucleus of the hypothalamus  
**DP**, Dorsal peduncular area cortex  
**ENT**, Entorhinal cortex  
    **ENTI**, Entorhinal cortex, lateral part  
    **ENTm**, Entorhinal cortex, medial part  
**EPd**, Endopiriform nucleus, dorsal part  
**EPv**, Endopiriform nucleus, ventral part  
**FS**, Fundus of the striatum  
**IAD**, Interanterodorsal nucleus thalamus  
**ILA**, Infralimbic area cortex  
**LA**, Lateral amygdalar area  
**LD**, Laterodorsal nucleus thalamus  
**LHA**, Lateral hypothalamic area  
**LPO**, Lateral preoptic nucleus  
**LSc**, Lateral septal nucleus, caudal part  
**LSr**, Lateral septal nucleus, rostral part  
    **LSrd**, Lateral septal nucleus, rostral part, dorsal  
    **LSrv**, Lateral septal nucleus, rostral part, ventral  
**LSv**, Lateral septal nucleus, ventral part  
**MEA**, Medial amygdalar nucleus  
    **MEAad**, Medial amygdalar nucleus, anterodorsal part  
    **MEAav**, Medial amygdalar nucleus, anteroventral part  
    **MEApd**, Medial amygdalar nucleus, posterodorsal part  
    **MEApv**, Medial amygdalar nucleus, posteroventral part  
**MEPO**, Median preoptic nucleus  
**MM**, medial mammillary nucleus  
**MPO**, Medial preoptic area  
**MPN**, Medial preoptic nucleus  
**MS**, Medial septal nuclei

**NDB**, Nucleus of the diagonal band  
**NLOT**, Nucleus of the lateral olfactory tract  
**ORBI**, Orbitofrontal area cortex, lateral part  
**ORBm**, Orbitofrontal area cortex, medial part  
**ORBvl**, Orbitofrontal area cortex, ventrolateral part  
**OT**, Olfactory tubercle  
**PA**, Posterior amygdalar nucleus  
**PAA**, Piriform amygdalar area  
**PAR**, Parasubiculum  
**PERI**, Perirhinal area cortex  
**PH**, Posterior hypothalamic nucleus  
**PIR**, Piriform area cortex  
**PL**, Prelimbic area cortex  
**PMv**, Ventral premammillary nucleus  
**PS**, Parastrial nucleus hypothalamus  
**POST**, Postsubiculum  
**PRE**, Presubiculum  
**PT**, Paratenial nucleus thalamus  
**PVp**, Periventricular hypothalamic nucleus, posterior part  
**PVT**, Paraventricular nucleus thalamus  
**RCH**, Retrochiasmatic area  
**RE**, Reuniens nucleus thalamus  
**RSPd**, Retrosplenial area cortex, dorsal part  
**RSPv**, Retrosplenial area cortex, ventral part  
**SBPV**, Subparaventricular zone hypothalamus  
**SI**, Substantia innominata  
**SUB**, Subiculum  
    **SUBd**, Subiculum dorsal  
        **SUBdd**, Subiculum dorsal, dorsal part  
        **SUBdv**, Subiculum dorsal, ventral part  
    **ProSUB**, Prosubiculum  
    **SUBv**, Subiculum ventral  
        **SUBvv**, Subiculum ventral, ventral tip  
**SUM**, Supramammillary nucleus  
**TMd**, Tuberomammillary nucleus, dorsal part  
**TMv**, Tuberomammillary nucleus, ventral part  
**TR**, Postpiriform transition area cortex  
**TTd**, Taenia tecta, dorsal part  
**TTv**, Taenia tecta, ventral part  
**TU**, Tuberal nucleus  
**VLPO**, Ventrolateral preoptic nucleus  
**VMH**, Ventromedial hypothalamic nucleus  
**VP**, Ventral pallidum
